# Supplementary material for: Matrix Metalloproteases in Pancreatic Ductal Adenocarcinoma: Key Drivers of Disease Progression?
Source: PubMed Central journal article supplement (PMC7235986; doi:10.3390/biology9040080), 2020-04-18
Supplement: biology-09-00080-s001.pdf [file biology-09-00080-s001.pdf]

**Supplemental Table 1: Search terms used and number of papers retrieved.**

| <b>Family</b>      | <b>Query in Pubmed</b>                | <b># of papers</b> |
|--------------------|---------------------------------------|--------------------|
| Collagenases       | Pancreatic cancer AND MMP1            | 45                 |
|                    | Pancreatic cancer AND collagenase 1   | 1                  |
|                    | Pancreatic cancer AND MMP8            | 5                  |
|                    | Pancreatic cancer AND collagenase 2   | 6                  |
|                    | Pancreatic cancer AND MMP13           | 14                 |
|                    | Pancreatic cancer AND collagenase 3   | 9                  |
| Gelatinases        | Pancreatic cancer AND MMP2            | 357                |
|                    | Pancreatic cancer AND gelatinase A    | 269                |
|                    | Pancreatic cancer AND MMP9            | 397                |
|                    | Pancreatic cancer AND gelatinase B    | 200                |
| Stromelysins       | Pancreatic cancer AND MMP3            | 28                 |
|                    | Pancreatic cancer AND stromelysin-1   | 20                 |
|                    | Pancreatic cancer AND MMP10           | 7                  |
|                    | Pancreatic cancer AND stromelysin-2   | 4                  |
|                    | Pancreatic cancer AND MMP11           | 8                  |
|                    | Pancreatic cancer AND stromelysin-3   | 7                  |
| Matrilysins        | Pancreatic cancer AND MMP7            | 81                 |
|                    | Pancreatic cancer AND matrilysin      | 59                 |
|                    | Pancreatic cancer AND MMP26           | 2                  |
|                    | Pancreatic cancer AND matrilysin-2    | 0                  |
| Transmembrane MMPs | Pancreatic cancer AND MMP14           | 29                 |
|                    | Pancreatic cancer AND MT1-MMP         | 49                 |
|                    | Pancreatic cancer AND MMP15           | 2                  |
|                    | Pancreatic cancer AND MT2-MMP         | 6                  |
|                    | Pancreatic cancer AND MMP16           | 6                  |
|                    | Pancreatic cancer AND MT3-MMP         | 5                  |
|                    | Pancreatic cancer AND MMP17           | 0                  |
|                    | Pancreatic cancer AND MT4-MMP         | 0                  |
|                    | Pancreatic cancer AND MMP24           | 1                  |
|                    | Pancreatic cancer AND MT5-MMP         | 0                  |
|                    | Pancreatic cancer AND MMP25           | 1                  |
|                    | Pancreatic cancer AND MT6-MMP         | 1                  |
| Others             | Pancreatic cancer AND MMP12           | 7                  |
|                    | Pancreatic cancer AND Metalloelastase | 4                  |
|                    | Pancreatic cancer AND MMP19           | 2                  |
|                    | Pancreatic cancer AND MMP20           | 1                  |
|                    | Pancreatic cancer AND MMP21           | 1                  |
|                    | Pancreatic cancer AND enamelysin      | 1                  |
|                    | Pancreatic cancer AND MMP22           | 0                  |
|                    | Pancreatic cancer AND MMP23           | 0                  |
|                    | Pancreatic cancer AND cysteine array  | 9                  |
|                    | Pancreatic cancer AND MMP27           | 0                  |
|                    | Pancreatic cancer AND MMP28           | 2                  |
|                    | Pancreatic cancer AND epilysin        | 0                  |
